# Supplementary material
Source: PubMed Central journal article supplement (PMC5868256)
Supplement: 10.1074_M117.815449_jbc.M117.815449-2.pdf [file 10.1074_M117.815449_jbc.M117.815449-2.pdf]

Table S1. Primer sets for RT-PCR and CHIP-QPCR.

Primer sets for QRT-PCR

| Markers |         | Sequences(5'→3')        |
|---------|---------|-------------------------|
| GAPDH   | Forward | GGAGCGAGATCCCTCCAAAAT   |
|         | Reverse | GGCTGTTGTCATACTTCTCATGG |
| OCT4    | Forward | CCTCACTTCACTGCACTGTA    |
|         | Reverse | CAGGTTTTCTTTCCCTAGCT    |
| NANOG   | Forward | TGAACCTCAGCTACAAACAG    |
|         | Reverse | TGGTGGTAGGAAGAGTAAAG    |
| PAX6    | Forward | TGGGCAGGTATTACGAGACTG   |
|         | Reverse | ACTCCCGCTTATACTGGGCTA   |
| SOX2    | Forward | GCCGAGTGAAACTTTTGTCG    |
|         | Reverse | GGCAGCGTGTACTTATCCTTCT  |
| SOX1    | Forward | CAGTACAGCCCCATCTCCAAC   |
|         | Reverse | GCGGGCAAGTACATGCTGA     |
| NESTIN  | Forward | CTGCTACCCTTGAGACACCTG   |
|         | Reverse | GGGCTCTGATCTCTGCATCTAC  |
| FOXG1   | Forward | GAGCGACGACGTGTTTCATC    |
|         | Reverse | GCCGTTGTAAC TCAAAGTGCTG |
| OTX2    | Forward | CAAAGTGAGACCTGCCAAAAAGA |
|         | Reverse | TGGACAAGGGATCTGACAGTG   |
| EMX2    | Forward | CGGCACTCAGCTACGCTAAC    |
|         | Reverse | CAAGTCCGGGTTGGAGTAGAC   |
| Lmx1b   | Forward | CGGACTGCGCCAAGATGTT     |
|         | Reverse | TTGACTCGCATCAGGAAGCG    |
| En1     | Forward | GAGCGCAGGGCACCAAATA     |
|         | Reverse | CGAGTCAGTTTTGACCACGG    |
| GBX2    | Forward | CCGCCTTCAGCATAGACTCG    |
|         | Reverse | GGTAGCCGGTGTAGACGAAAT   |
| HOXB2   | Forward | CGCCAGGATTCACCTTTCCTT   |
|         | Reverse | CCCTGTAGGCTAGGGGAGAG    |
| HOXA2   | Forward | ATAACGGAGGGGAGCCTAAG    |
|         | Reverse | GCTCAGACAAACAGAGCGTG    |
| WNT3A   | Forward | GCTTCTGCAGGAACTACGTG    |
|         | Reverse | GACTCCCTGGTAGCTTTGTCC   |
| MIXL1   | Forward | GGCGTCAGAGTGGGAAATCC    |
|         | Reverse | GGCAGGCAGTTCACATCTACC   |
| EOMES   | Forward | CAGGCGCATGTTTTCTTT      |
|         | Reverse | CCCTGCATGTTATTGTCCG     |

Primer sets for CHIP-QPCR

|           |         | Sequences(5'→3')           |
|-----------|---------|----------------------------|
| OTX2 +500 | Forward | GCAGTCCCAGGGCATTACTGAC     |
|           | Reverse | GGTCATTGAGATATGGGTAGGGGTC  |
| OTX2 +1   | Forward | GTCTTATCTTAAGCAACCGCCTTAC  |
|           | Reverse | ATACCCGAAGTGGTCAGACTCAG    |
| OTX2 -1   | Forward | CTTTAAAAGCCTCTGCCTCGCC     |
|           | Reverse | GGGTACCCAGCTGGAAGATCTTG    |
| OTX2 -2   | Forward | TAATTTAAAATCTCTGCCATGGAAAG |
|           | Reverse | CTGGCACTAGCTAATTGTCTCAAAC  |
| OTX2 -3   | Forward | TTTGTTTAGCTTTCGTTCCCTTAGAC |
|           | Reverse | ACCAACTCACTAAACCACAAACTTG  |
| OTX2 -4   | Forward | GGACCCAAATGTCTGAAAATTTG    |
|           | Reverse | AAAAAGTCTTCAAGATTGGCACAG   |

Table S2. Information for antibodies.

## Antibodies used in FACS

| Name | Company | Cat. #  | Host  | Dilution |
|------|---------|---------|-------|----------|
| PAX6 | BD      | 561664  | Mouse | 1:200    |
| T    | R&D     | IC2085A | Goat  | 1:200    |

## Antibodies used in western blot

| Name                     | Company           | Cat. #  | Host   | Dilution |
|--------------------------|-------------------|---------|--------|----------|
| PAX6                     | Abcam             | Ab5790  | Rabbit | 1:1000   |
| GSK3 $\beta$             | CST               | 9832    | Mouse  | 1:1000   |
| Phos-GSK3 $\beta$ (Ser9) | CST               | 5558    | Rabbit | 1:1000   |
| NANOG                    | R&D               | Af1997  | Goat   | 1:500    |
| OTX2                     | Abcam             | Ab21990 | Rabbit | 1:500    |
| OCT4                     | Santa cruze       | sc-5279 | Mouse  | 1:500    |
| GAPDH                    | Kangchen Bio-tech | KG-5G5  | Mouse  | 1:1000   |

## Antibodies used in immunofluorescence

| Name     | Company     | Cat. #     | Host   | Dilution |
|----------|-------------|------------|--------|----------|
| SOX2     | R&D         | MAB2018    | Mouse  | 1:500    |
| NESTIN   | Millipore   | ABD69      | Rabbit | 1:1000   |
| Ki67     | BD          | 556003     | Mouse  | 1:200    |
| GFAP     | Sigma       | SAB4501162 | Mouse  | 1:1000   |
| Tuj1     | Convance    | PRB-435P   | Rabbit | 1:1000   |
| MAP2     | Millipore   | MAB3418    | Mouse  | 1:1000   |
| NeuN     | Millipore   | ABN78      | Rabbit | 1:400    |
| Synapsin | Calbiochem  | 574777     | Rabbit | 1:1000   |
| ISLET    | DSHB        | 39.4D5     | Mouse  | 1:500    |
| TH       | Millipore   | MAB318     | Mouse  | 1:500    |
| GABA     | Sigma       | A2052      | Rabbit | 1:2000   |
| NANOG    | R&D         | Af1997     | Goat   | 1:200    |
| OTX2     | Abcam       | Ab21990    | Rabbit | 1:200    |
| OCT4     | Santa cruze | sc-5279    | Mouse  | 1:200    |

## Antibody used in CHIP

| Name  | Company | Cat. # | Host | Dilution |
|-------|---------|--------|------|----------|
| NANOG | R&D     | Af1997 | Goat | 1:1000   |

Table S3 Selected genes relating regional formation and regualting pathway.

| GeneSymbol | H1-SD-1 | H1-SDC-1 | H1-SD-2 | H1-SDC-2 | H1-SD-3 | H1-SDC-3 |
|------------|---------|----------|---------|----------|---------|----------|
| OTX1       | 9.24    | 0.1      | 6.31    | 0.09     | 2.17    | 0.23     |
| OTX2       | 325.26  | 1.16     | 285.2   | 1.1      | 399.18  | 0.65     |
| PAX6       | 319.61  | 375.82   | 113.34  | 700.5    | 135.21  | 463.11   |
| FOXC1      | 493.14  | 0        | 293.71  | 0.1      | 472.92  | 0.26     |
| EMX1       | 0.98    | 0.13     | 0.14    | 0.12     | 6       | 0        |
| EMX2       | 33.89   | 0        | 29.53   | 0.21     | 90.45   | 0        |
| EN1        | 0       | 1.59     | 0       | 2.31     | 0       | 0.81     |
| EN2        | 0.08    | 1.69     | 0       | 2.54     | 0.08    | 0        |
| SOX1       | 110.57  | 83.65    | 64.21   | 92.09    | 100.46  | 74.38    |
| LMX1B      | 0.4     | 9.46     | 22.99   | 10.46    | 0.7     | 3.57     |
| GBX2       | 0       | 79.26    | 0.3     | 121.61   | 0       | 44.36    |
| HOXA1      | 0       | 4.93     | 0       | 7.73     | 0       | 3.71     |
| HOXA2      | 0       | 108.27   | 0       | 103.72   | 0.14    | 88.21    |
| HOXA3      | 0       | 2.6      | 0       | 6.96     | 0       | 1.11     |
| HOXA4      | 0       | 0        | 0       | 0        | 0       | 0        |
| HOXA5      | 0       | 0        | 0       | 1.51     | 0       | 0        |
| HOXA6      | 0       | 0        | 0       | 0.3      | 0       | 0        |
| HOXA7      | 0       | 0        | 0       | 0.77     | 0       | 0        |
| HOXA9      | 0       | 0        | 0       | 0.48     | 0.21    | 0        |
| HOXA10     | 0       | 0        | 0       | 0        | 0       | 0        |
| HOXB1      | 0       | 28.83    | 0       | 12.36    | 0       | 2.33     |
| HOXB2      | 0       | 205.35   | 0       | 132.88   | 0       | 28.21    |
| HOXB3      | 0       | 28.08    | 0       | 18.11    | 0       | 2.18     |
| HOXB4      | 0       | 0.29     | 0       | 0.55     | 0       | 0.17     |
| HOXB5      | 0       | 0.14     | 0       | 0.53     | 0       | 0.16     |
| HOXB6      | 0       | 0.23     | 0       | 2.29     | 0       | 0        |
| HOXB8      | 0       | 1.52     | 0       | 2.82     | 0.31    | 1.09     |
| HOXB9      | 0       | 2.86     | 0       | 7.45     | 0       | 0        |
| HOXB13     | 0       | 0        | 0       | 0        | 0       | 0        |
| HOXC4      | 0       | 0        | 0       | 0.71     | 0       | 0        |
| HOXC9      | 0       | 0        | 0       | 0.18     | 0       | 0        |
| HOXC10     | 0       | 0        | 0       | 0        | 0       | 0        |
| HOXC5      | 0       | 0        | 0       | 0.15     | 0       | 0        |
| HOXC6      | 0       | 0.33     | 0       | 1.28     | 0       | 0        |
| HOXD1      | 0       | 0        | 0       | 0        | 0       | 0        |
| HOXD3      | 0       | 0.06     | 0       | 0.12     | 0       | 0        |
| HOXD4      | 0       | 0        | 0       | 0.19     | 0       | 0        |
| HOXD8      | 0       | 0        | 0       | 0        | 0       | 0        |
| HOXD9      | 0       | 0        | 0       | 0        | 0       | 0.27     |
| HOXD10     | 0       | 0        | 0       | 0        | 0       | 0        |
| HOXD11     | 0       | 0        | 0       | 0        | 0       | 0        |
| HOXD12     | 0       | 0        | 0       | 0        | 0       | 0        |
| HOXD13     | 0       | 0        | 0       | 0.12     | 0.13    | 0.15     |
| SMAD1      | 40.2    | 31.67    | 41.31   | 37.83    | 41.92   | 47.77    |
| SMAD2      | 66.34   | 50.95    | 74.66   | 60.87    | 57.65   | 59.64    |
| SMAD3      | 45.69   | 69.8     | 36.27   | 59.84    | 43.33   | 57.38    |
| SMAD4      | 179.52  | 163.23   | 168.03  | 193.96   | 138.24  | 163.36   |
| SMAD5      | 47.12   | 37.89    | 44.77   | 63.29    | 37.54   | 35.03    |
| SMAD6      | 3.39    | 4.27     | 1.44    | 6.83     | 2.37    | 8.67     |
| SMAD7      | 5.22    | 6.74     | 6.53    | 8.92     | 2.85    | 7.36     |
| SMAD9      | 1.43    | 2.21     | 2.69    | 1.83     | 1.79    | 1.82     |
| WLS        | 8.14    | 333.77   | 8.26    | 236.23   | 1.51    | 130.42   |
| WNT1       | 0.5     | 0.77     | 0.57    | 0.49     | 0       | 0.61     |
| WNT3       | 12.08   | 22.58    | 7.47    | 18.91    | 11.95   | 9.71     |
| WNT3A      | 0       | 1.6      | 0       | 1.02     | 0.09    | 1.34     |

|        |        |        |        |        |        |        |
|--------|--------|--------|--------|--------|--------|--------|
| WNT4   | 1.08   | 1.87   | 2.15   | 1.56   | 32.51  | 0.9    |
| WNT5A  | 3.95   | 7.77   | 4.45   | 13.86  | 2.21   | 8.65   |
| WNT5B  | 112.75 | 19.29  | 93.78  | 25.27  | 152.62 | 28.73  |
| WNT7A  | 24.29  | 17.54  | 4.12   | 45.14  | 6.77   | 37.04  |
| WNT8B  | 0.39   | 1.6    | 0.15   | 3.46   | 0      | 0.63   |
| WNT10A | 0      | 0      | 0      | 0      | 0      | 0      |
| WNT10B | 1      | 0.93   | 1.6    | 0.99   | 0.82   | 0.59   |
| WNT11  | 1.57   | 0.44   | 0      | 0.71   | 0      | 0      |
| WNT16  | 0.25   | 0.21   | 0.1    | 0      | 0      | 0      |
| SALL1  | 41.31  | 95.06  | 23.35  | 115.67 | 46.91  | 155.21 |
| SALL4  | 93.62  | 68.89  | 61.42  | 134.89 | 96.53  | 112.83 |
| STAT3  | 69.84  | 56.58  | 58.68  | 35.78  | 40.03  | 36.21  |
| ESRRB  | 0.8    | 4.02   | 0.55   | 1.2    | 0.99   | 3.03   |
| FGF2   | 16.41  | 12.05  | 16.89  | 9.45   | 9.42   | 7.48   |
| AXIN1  | 33.25  | 36.32  | 33.96  | 28.41  | 32.41  | 24.56  |
| AXIN2  | 25.5   | 30.27  | 14.28  | 23.68  | 22.21  | 35.79  |
| LRP5   | 42.4   | 19.27  | 34.7   | 37.56  | 35.47  | 27.31  |
| LRP6   | 45.11  | 31.91  | 46.05  | 43.97  | 26.82  | 24.2   |
| AKT1   | 141.71 | 192.76 | 151.62 | 186.87 | 147.7  | 153.15 |
| AKT2   | 253.66 | 173.94 | 172.34 | 208.59 | 183.46 | 151.61 |
| AKT3   | 60.22  | 40.01  | 43.77  | 62.65  | 49.98  | 51.01  |
