# Supplementary material
Source: PubMed Central journal article supplement (PMC5868256)

**Figure S1**

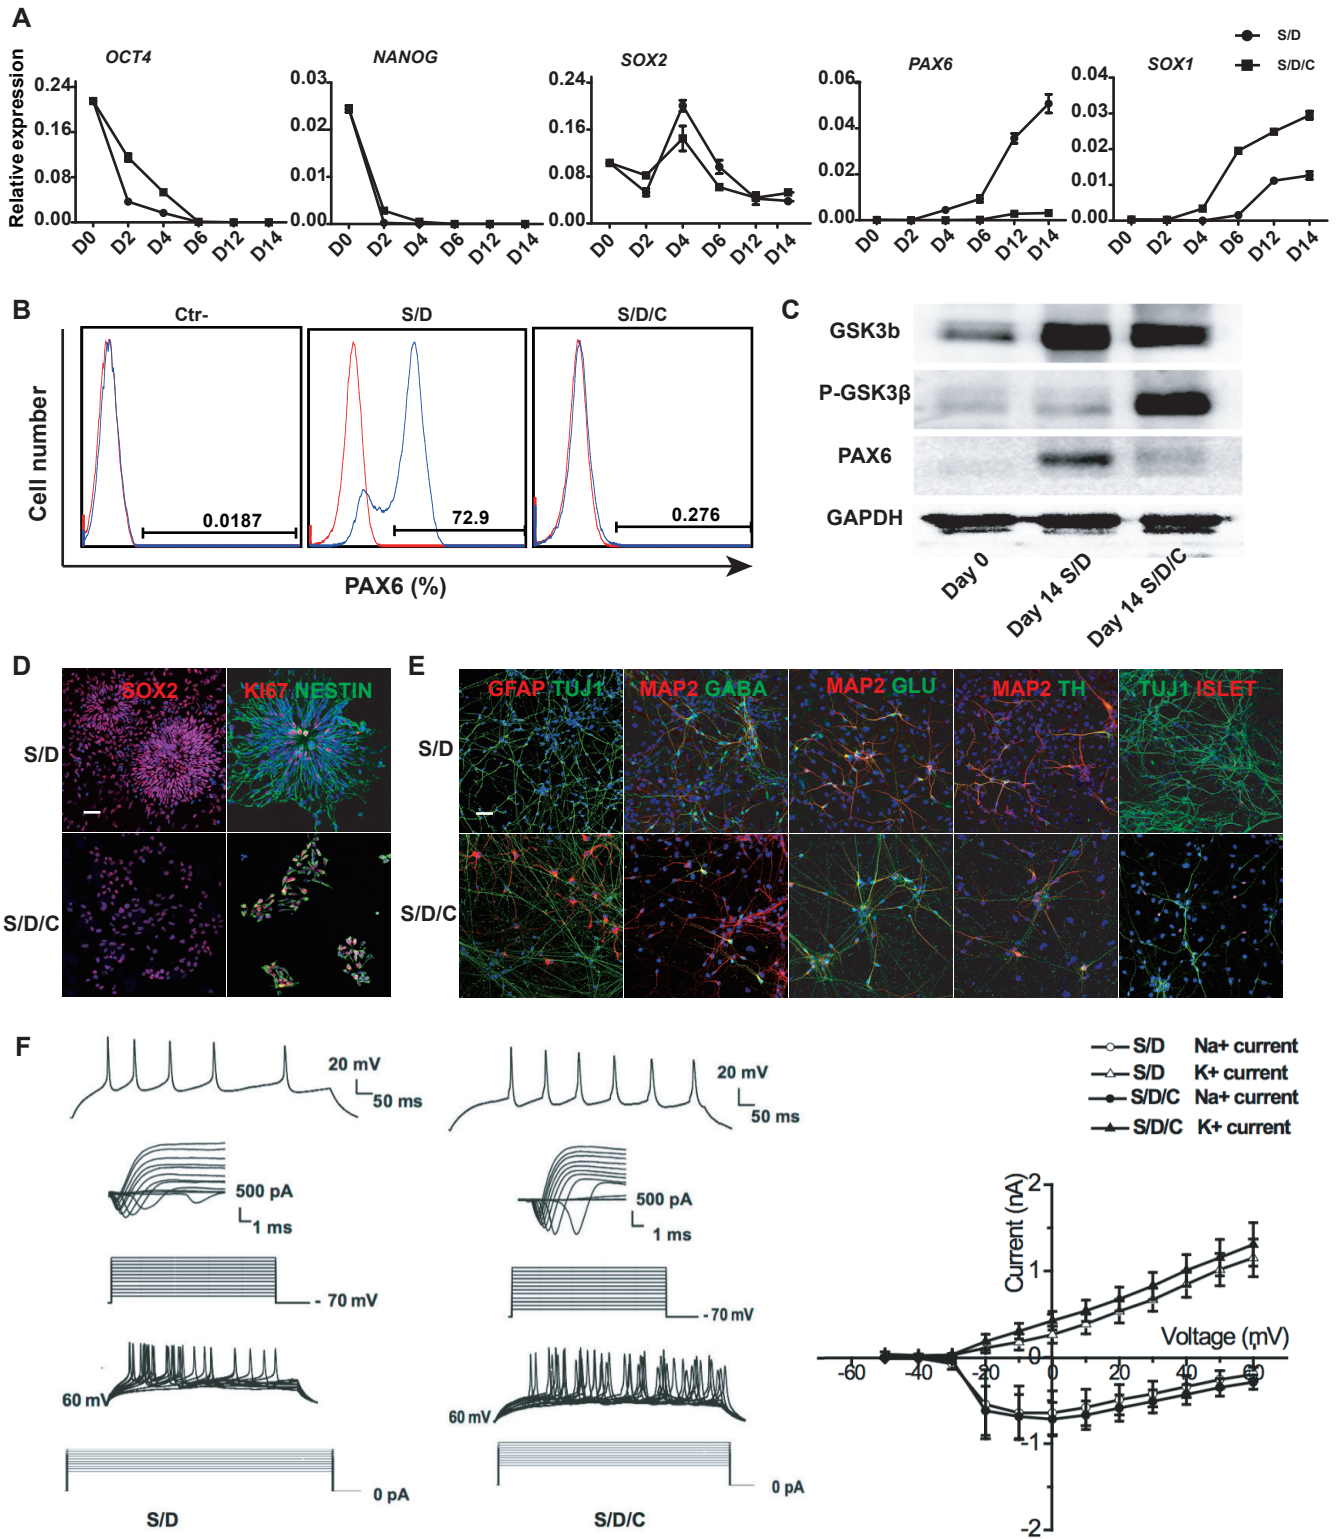

**Figure S2**

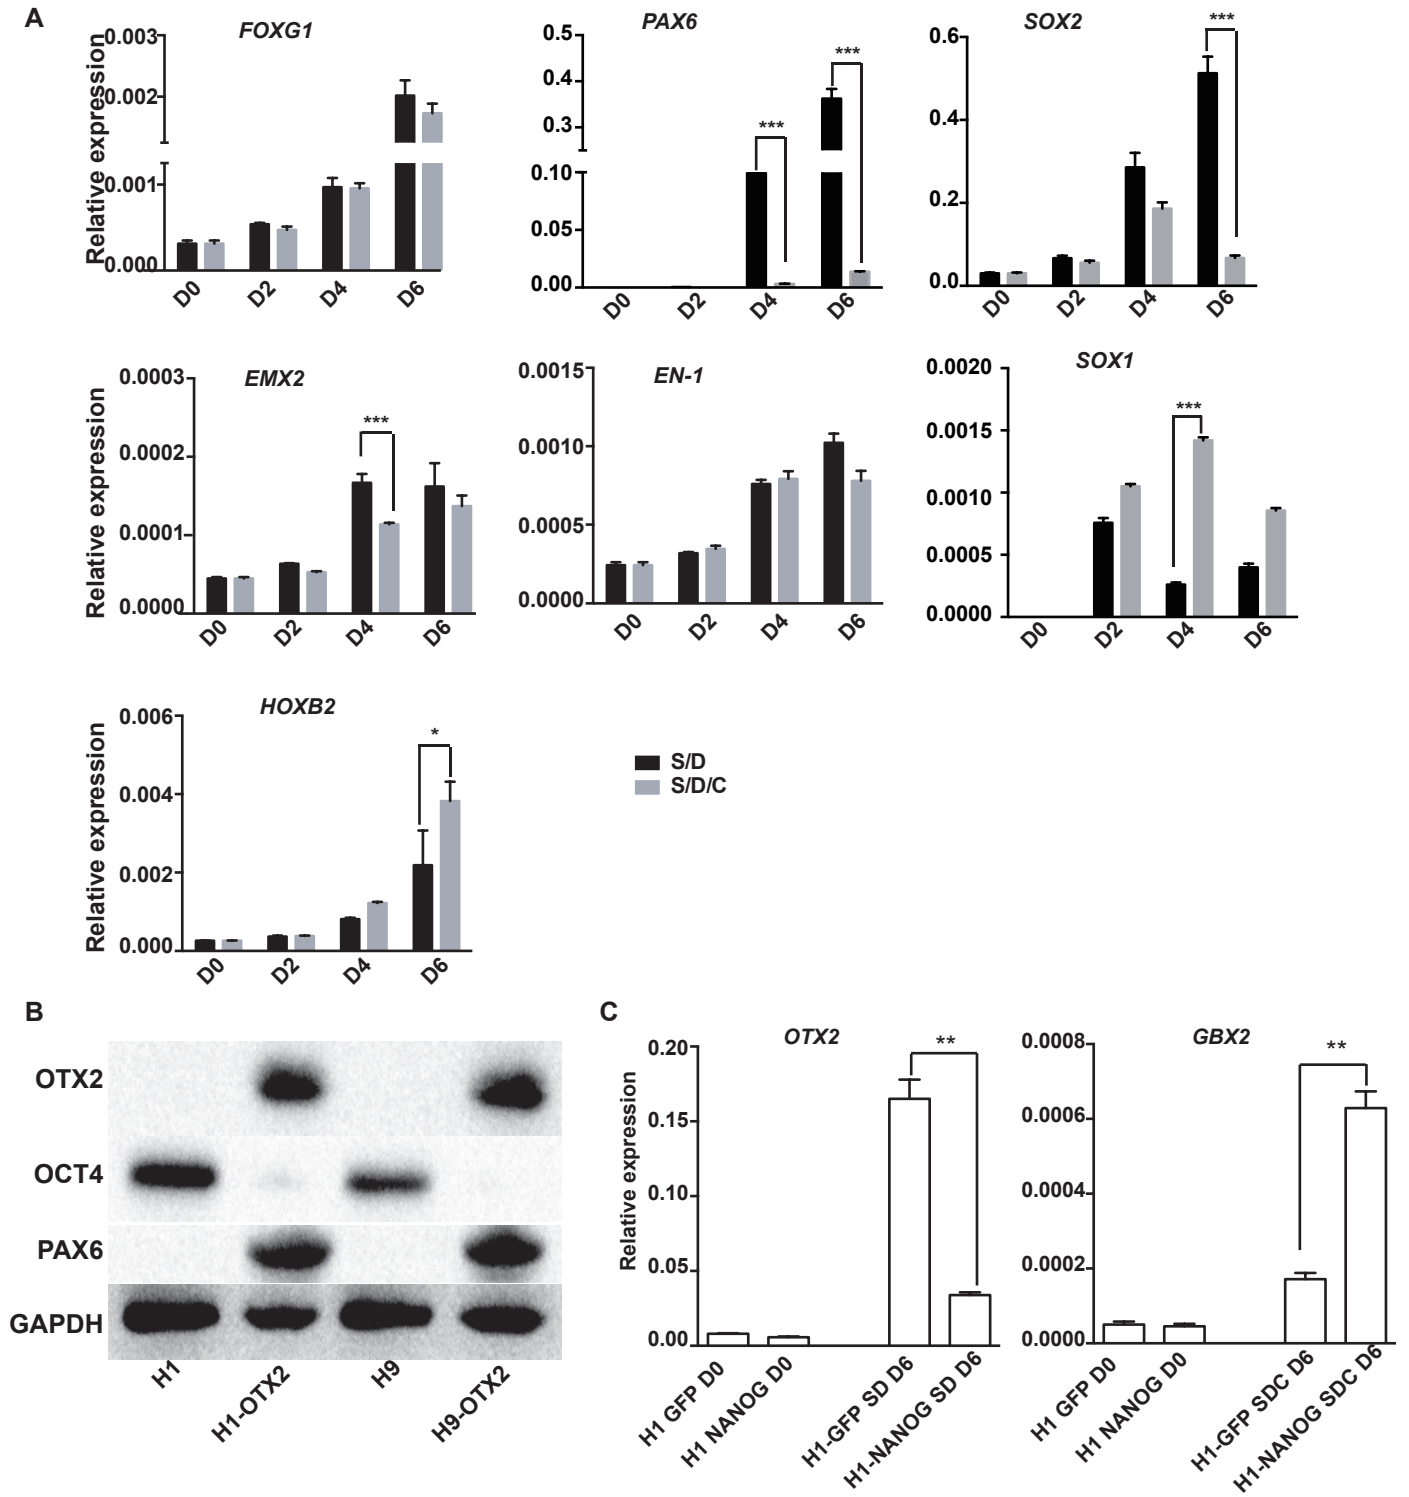

Supplement: 10.1074_M117.815449_jbc.M117.815449-1.pdf [file 10.1074_M117.815449_jbc.M117.815449-1.pdf]
